# Supplementary material
Source: PubMed Central journal article supplement (PMC5971146)
Supplement: NIHMS937948-supplement.pdf [file NIHMS937948-supplement.pdf]

**Supplementary Table 1. RT-PCR primer sequences.**

|               |                                                                                        |
|---------------|----------------------------------------------------------------------------------------|
| HPRT          | F: 5'-CAG ACT GAA GAG CTA TGG TAA TG-3'<br>R: 5' CCA GTG TCA ATT ATA TCT TCC AC-3'     |
| Cyp2R1        | F: 5'-TTT GTC AAC ATC TGC T-3'<br>R: 5'-TGC CTC CAA GAT CTA AAC TGA AA-3'              |
| Cyp27A1       | F: 5'-CCT CAC CTA TGG GAT CTT CAT C-3'<br>R: 5'-TTT AAC GCA TCC GTG TAG AGC-3'         |
| Cyp24A1       | F: 5'-ACC CCC AAG GTC CGT GAC ATC-3'<br>R: 5'-CCA GTT GGG TCC AGG TAA GG-3'            |
| Cyp27B1       | F: 5'-GAC CAT ATT GGC CCG TAC C-3'<br>R: 5'-CAG CTT GGC TGA ACT CT-3'                  |
| VDR           | F: 5'-CTG CAC CTC CTC ATC TGT GA-3'<br>R: 5'-CCC CTT CAA TGG AGA TTG C-3'              |
| TNF- $\alpha$ | F: 5'-TGG GAG TAG ACA AGG TAC AAC CC-3'<br>R: 5'-CAT CTT CTC AAA ATT CGA GTG ACA A-3'  |
| IL-1 $\beta$  | F: 5'-AGT TGA CGG ACC CCA AAA G-3'<br>R: 5'-AGC TGG ATC CTC TCA TCA GG-3'              |
| IL-6          | F: 5'-GCT ACC AAA CTG GAT ATA ATC AGG A-3'<br>R: 5'-CCA GGT AGC TAT GGT ACT CCA GAA-3' |
| IFN- $\gamma$ | F: 5'-TGC ATC TTG GCT TGG CAG CTC TTC-3'<br>R: 5'-GGG TTG ACC TCA AAC TTG GCA-3'       |

## Supplementary Figure 1

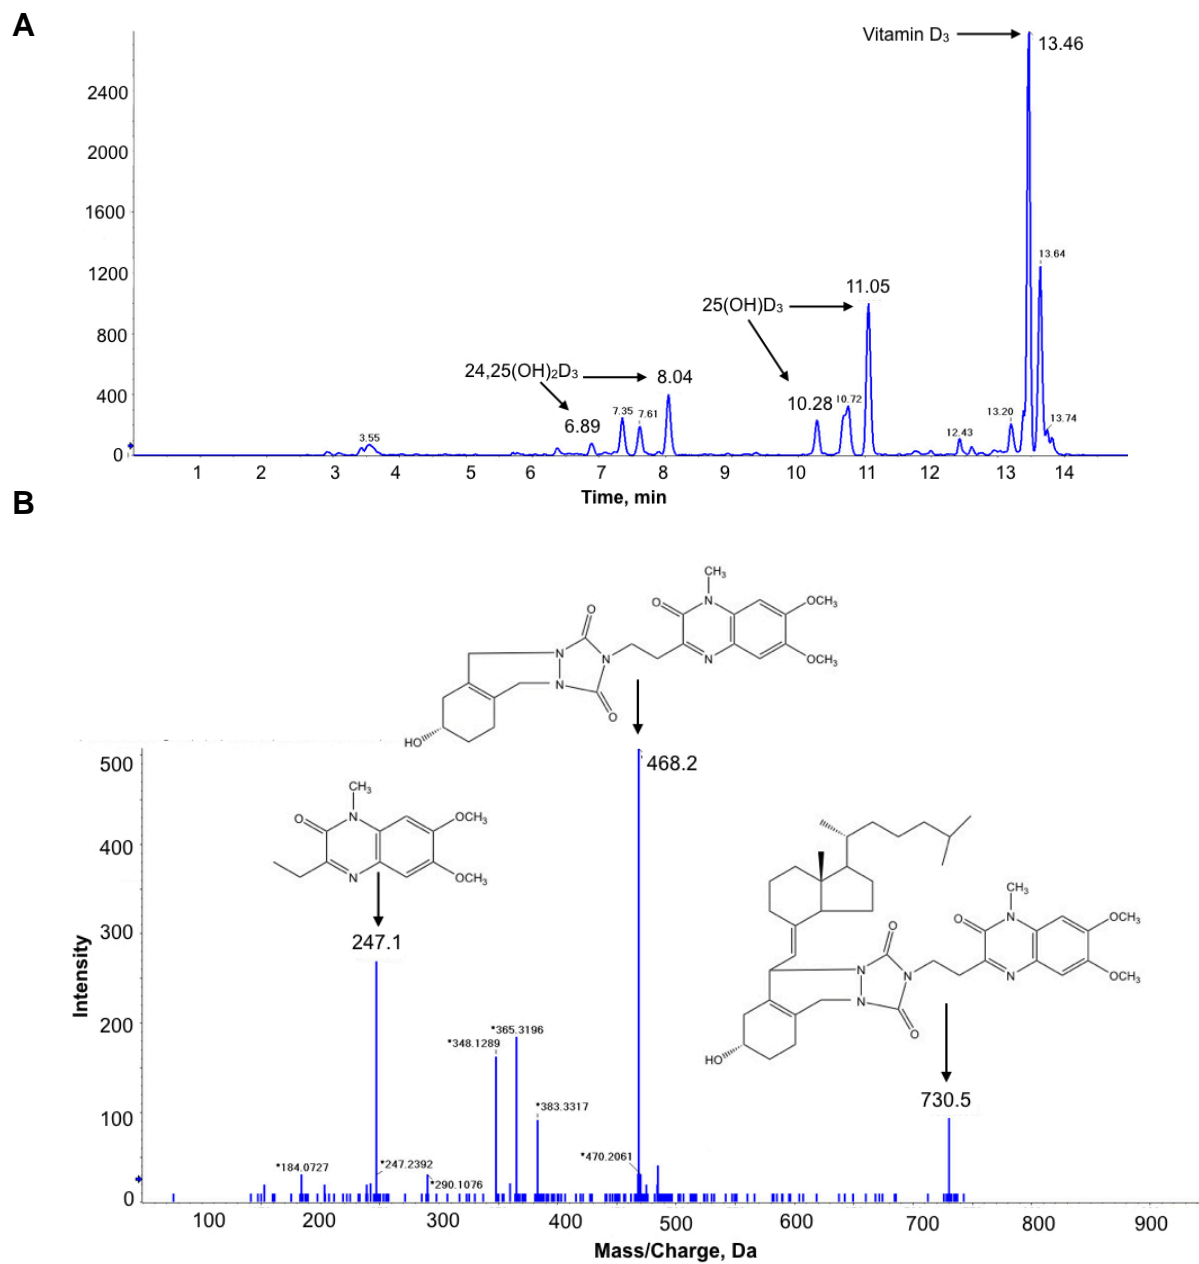

## Supplementary Figure 1, continued

B

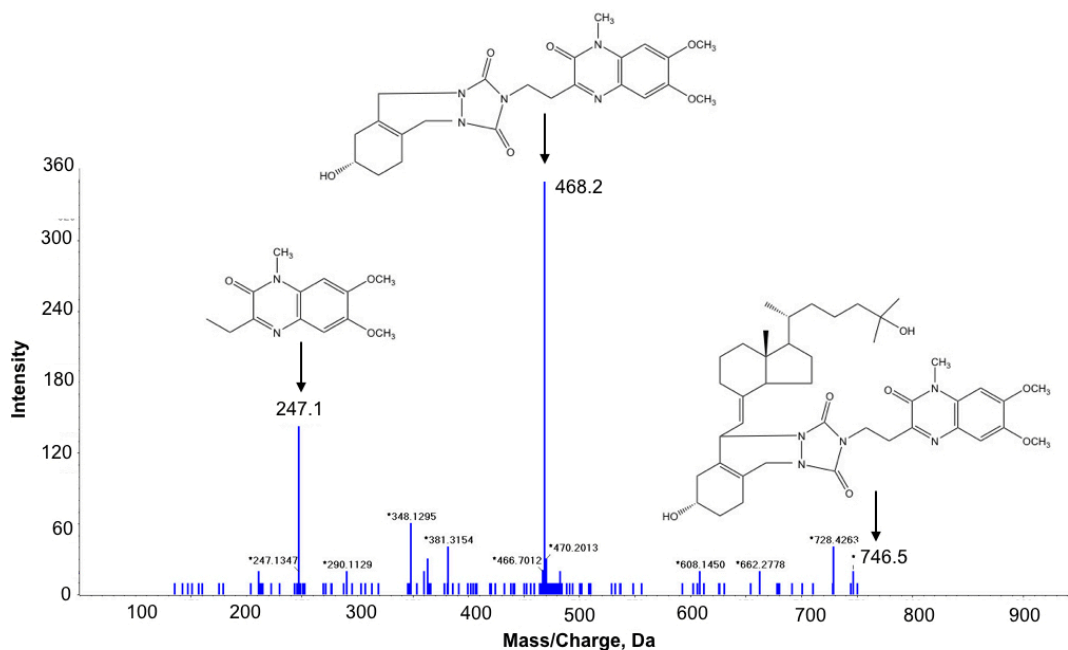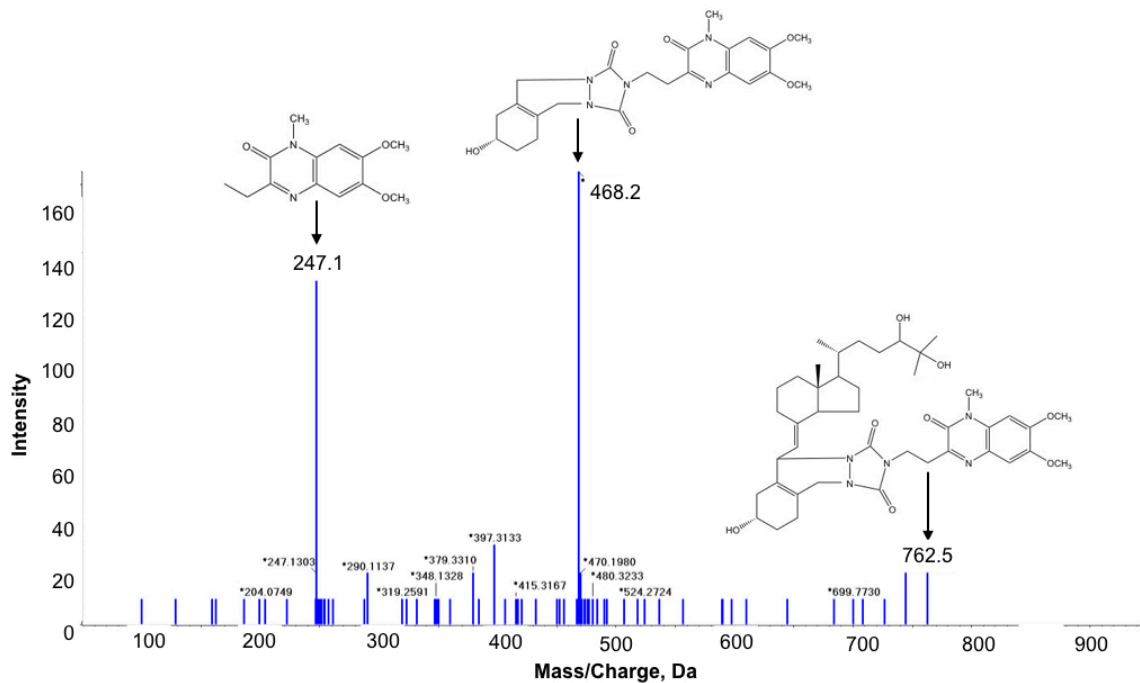

**Supplementary Figure 1. Chromatogram and fragmentation of DMEQ-TAD adducts of vitamin D, 25D, and 24,25D.** A) Composite chromatogram of multiple reaction monitoring for vitamin D, 25D, and 24,25D. B) Mass spectra for DMEQ-TAD adducts of vitamin D (730.5- $\rightarrow$ 468.2), 24,25D (746.5- $\rightarrow$ 468.2), and 24,25D (762.5- $\rightarrow$ 468.2), indicating that  $m/z=468.2$  is the major fragment of vitamin D, 25D, and 24,25D ions, and  $m/z=247.1$  is the fragment of DMEQ-TAD

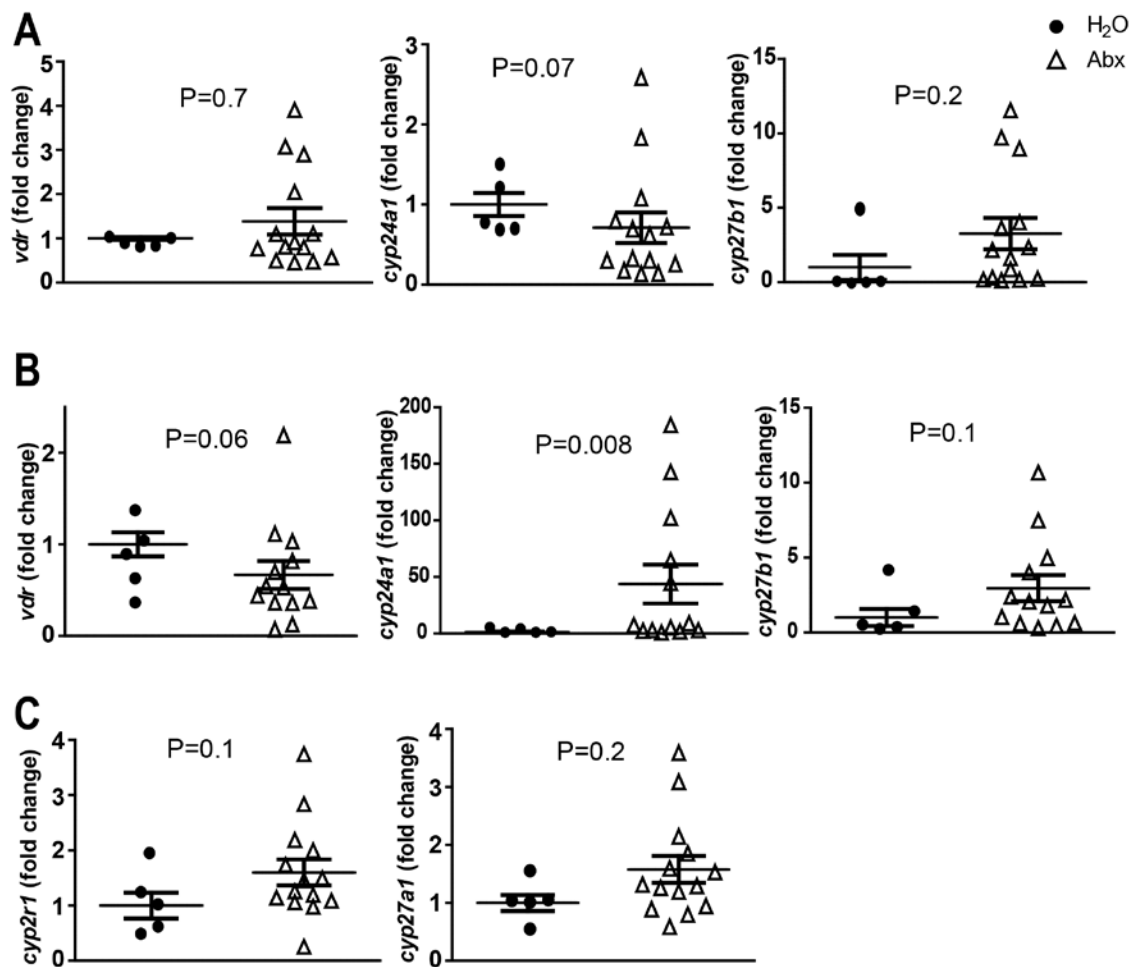

**Supplementary Figure 2. Abx treatment induced *cyp24a1* expression in the colon.** Expression of mRNA for *cyp24a1*, *cyp27b1*, and *vdr* in the A) kidney and B) colon. C) Expression of *cyp2r1* and *cyp27a1* in the liver. Values are expressed as fold change of the water group. Values are the mean  $\pm$  SEM of a mix of male and female mice in the (n=5) water group, and n=13-14 in the Abx group. Mann-Whitney test was used to test significance.
